# Supplementary material for: Diagnostic Yield of Chilaiditi’s Sign in Advanced-Phase Late-Onset Pompe Disease
Source: Research Square preprint supplement (doi:10.21203/rs.3.rs-957536/v1), 2021-10-12
Supplement: Supplementary file 1 [file 7c814d36d31a6ada6cd3b7e4.xlsx]

## Sheet: Table1
		Table1. Clinical and molecular data of 7 LOPD patients
			sex	genotyping	Age at last evaluation	Age at clinical onset	Age at diagnosis	Age at ERT	Age at mechanical ventilation	Age at death, causes	ambulation	Ventilation
		P1	F	c. 1309C>T(p. R437C)/ c. 1857C>G (p. S619R)	41	8	21	36	32	41, pneumoniae	non-ambulant	continuous NPPV
		P2	F	c. 307T>C (p. C103R)/c. 546G>A (p. T182T)	47	25	39	43	36	47, pneumoniae	non-ambulant	continuous TPPV
		P3	F	c.2173C>T(p. R725W)/ c. 2020C>T(p. H674Y)	66	25	30	56	35	alive	non-ambulant	noctural NPPV with tracheostomy
		P4	F	c.546G>T(p. T182T)/c. 1798 C>T(p.R600C)	45	7	14	32	21	alive	non-ambulant	continuous NPPV
		P5	F	c. 546G>T (p. T182T) homozygote	84	35	62	76	65	alive	non-ambulant	continuous NPPV
		P6	M	c1585-1586TC>GT(p.S529V) homozygote	74	35	42	66	58	74, intestinal volvulus	non-ambulant	continuous NPPV
		P7	M	c.546G>T(p. T182T) homozygote	67	35	49	54	49	alive	non-ambulant	continuous NPPV
		Age is expressed in years. ERT: enzyme replacement therapy

## Sheet: Table2
		Table2. Demographics and clinical characteristics by Chiliditi and non-Chiliditi symptoms groups.
			All (n=7)	non-CS (n=4)		CS (n=3)	p
		Pat.-Nr.	P1-7	P1-4		P5-7
		Sex, male (%)	2 (29)	0 (0)		2 (66)	0.143
		Age, year, median (IQR)
		at clinical onset	25 (22-36)	22 (19-23)		36 (36-37)	0.057
		at diagnosis	39 (26-46)	26 (19-32)		49 (46-56)	0.057
		at muscle CT evaluated	58 (44-67)	44 (42-49)		74 (66-79)	0.114
		at ERT started	54 (40-61)	40 (35-46)		65 (60-71)	0.114
		at ventilation started	36 (34-54)	34 (29-35)		58 (54-62)	0.057
		Duration, median (IQR)
		from onset to evaluation	29 (23-35)	27 (23-30)		36 (29-43)	0.4
		from onset to ERT started	21 (19-29)	20 (18-24)		27 (23-34)	0.629
		of ERT	4 (4-9)	4 (3-6)		8 (6-9)	0.47
		of mechanical ventilation, year	16 (9-20)	16 (10-22)		16 (12-18)	0.721
		Lean body mass, kg	23.2 (21.0-25.7)	21.0 (20.0-22.3)		26.5 (25.7-32.6)	0.0571
		Total fat weight, kg	16.0 (11.9-23.4)	11.9 (11.0-17.9)		20.5 (18.3-23.4)	0.4
		Body mass index, kg/m2	15.6 (14.5-19.0)	14.5 (13.8-15.2)		19.7 (19.0-21.2)	0.0571
		CS: Chiliditi sign, ERT: enzyme replacement therapy.

## Sheet: Table3
		Table3. Comparison of risk factor of Chiliditi syndome between groups.
			All (n=7)	non-CS (n=4)	CS (n=3)	p
		Characteristics
		NPPV, n, %	5 (71)	2 (50)	3 (100)	0.429
		Disphagia, n, %	3 (43)	3 (75)	0 (0)	0.143
		Gastrostomy, n, %	1 (14)	1 (25)	0 (0)	1
		Aerophasia, n, %	4 (57)	1 (25)	3 (100)	0.143
		Radiological findings
		Rt. Diaphragm, grade, median, range	3 (43)	0 (0-3)	3 (3-4)	0.0286
		Abnormal position of right diaphragm, n, %	3 (43)	0 (0)	3 (100)	0.0286
		Liver under the left diaphragm, n, %	3 (43)	0 (0)	3 (100)	0.0286
		Liver atrophy, n, %	2 (29)	0 (0)	2 (67)	0.143
		Small/large bowel dilation, n, %	3 (43)	0 (0)	3 (100)	0.029
		Values are presented as n (%), CS: Chiliditi sign, NPPV: Non-invasive positive pressure ventilation.
